# Supplementary material for: Overexpression of plastid lipid-associated protein in marine diatom enhances the xanthophyll synthesis and storage
Source: Front Microbiol. 2023 Apr 21;14:1143017. doi: 10.3389/fmicb.2023.1143017 (PMC10160619; doi:10.3389/fmicb.2023.1143017)
Supplement: Supplementary file 3 [file Table_2.xlsx]

## Sheet: Gene list
tax_id	Org_name	GeneID	Symbol	Aliases	Protein	description	other_designations	map_location	chromosome	genomic_nucleotide_accession.version	start_position_on_the_genomic_accession	end_position_on_the_genomic_accession	orientation	exon_count
3702	Arabidopsis thaliana	821921	FIB4	AT3G23400, fibrillin 4	NP_001326953.1	Plastid-lipid associated protein PAP / fibrillin family protein	Plastid-lipid associated protein PAP / fibrillin family protein		3	NC_003074.8	8376444	8378364	minus	4
3702	Arabidopsis thaliana	828319	AT4G22240	AT4G22240, FBN1b, T10I14.70, T10I14_70, fibrillin 1b	NP_193955.1	Plastid-lipid associated protein PAP / fibrillin family protein	Plastid-lipid associated protein PAP / fibrillin family protein		4	NC_003075.7	11765803	11767422	minus	3
3702	Arabidopsis thaliana	825714	FIB	AT4G04020, FIB1a, PGL35, T24H24.16, T24H24_16, fibrillin, fibrillin 1a, plastoglobulin 35	NP_192311.1	fibrillin	fibrillin		4	NC_003075.7	1931883	1933950	plus	3
3702	Arabidopsis thaliana	832116	AT5G19940	AT5G19940, F28I16.90, F28I16_90	NP_001154722.1;NP_197494.1	Plastid-lipid associated protein PAP / fibrillin family protein	Plastid-lipid associated protein PAP / fibrillin family protein		5	NC_003076.8	6739624	6740957	plus	4
3702	Arabidopsis thaliana	830842	AT5G09820	AT5G09820, MYH9.3, MYH9_3	NP_001031862.1;NP_196544.3;NP_001330170.1	Plastid-lipid associated protein PAP / fibrillin family protein	Plastid-lipid associated protein PAP / fibrillin family protein		5	NC_003076.8	3055618	3057578	minus	6
3702	Arabidopsis thaliana	818114	AT2G35490	AT2G35490, T32F12.13, T32F12_13	NP_181092.1	Plastid-lipid associated protein PAP / fibrillin family protein	Plastid-lipid associated protein PAP / fibrillin family protein		2	NC_003071.7	14912098	14913894	minus	3
3702	Arabidopsis thaliana	822205	AT3G26080	AT3G26080	NP_189237.2;NP_001326410.1	plastid-lipid associated protein PAP / fibrillin family protein	plastid-lipid associated protein PAP / fibrillin family protein		3	NC_003074.8	9528774	9530582	plus	5
3702	Arabidopsis thaliana	822204	AT3G26070	AT3G26070	NP_189236.3	Plastid-lipid associated protein PAP / fibrillin family protein	Plastid-lipid associated protein PAP / fibrillin family protein		3	NC_003074.8	9526687	9528703	plus	6
3702	Arabidopsis thaliana	841534	AT1G51110	AT1G51110, AT1G51115, F23H24.16, F23H24_16	NP_175522.2	Plastid-lipid associated protein PAP / fibrillin family protein	Plastid-lipid associated protein PAP / fibrillin family protein		1	NC_003070.9	18935301	18937665	plus	11
3702	Arabidopsis thaliana	828231	AT4G00030	AT4G00030, F6N15.13, F6N15_13	NP_191914.1	Plastid-lipid associated protein PAP / fibrillin family protein	Plastid-lipid associated protein PAP / fibrillin family protein		4	NC_003075.7	13527	14413	plus	3
3702	Arabidopsis thaliana	824970	PGL34	AT3G58010, plastoglobulin 34kD	NP_001325643.1;NP_191360.1	plastoglobulin 34kD	plastoglobulin 34kD		3	NC_003074.8	21475805	21478187	minus	8
556484	Phaeodactylum tricornutum CCAP 1055/1	7198848	PHATRDRAFT_55153	PHATRDRAFT_55153	XP_002184985.1	pap-fibrillin-ii			27	NC_011695.1	193540	194505	plus	1
556484	Phaeodactylum tricornutum CCAP 1055/1	7203421	PAP-fibrillin-1	PHATRDRAFT_48066	XP_002182473.1	hypothetical protein			16	NC_011684.1	92243	93667	plus	3
556484	Phaeodactylum tricornutum CCAP 1055/1	7196887	PHATRDRAFT_32261	PHATRDRAFT_32261	XP_002176901.1	predicted protein			1	NC_011669.1	2069297	2070193	plus	1
556484	Phaeodactylum tricornutum CCAP 1055/1	7204300	PHATR_43886	PHATR_43886	XP_002186041.1	hypothetical protein			3	NC_011671.1	322236	323071	plus	1
556484	Phaeodactylum tricornutum CCAP 1055/1	7203338	PHATRDRAFT_38623	PHATRDRAFT_38623	XP_002182708.1	hypothetical protein			16	NC_011684.1	549957	550823	minus	1
556484	Phaeodactylum tricornutum CCAP 1055/1	7200820	PHATRDRAFT_45813	PHATRDRAFT_45813	XP_002180024.1	hypothetical protein			8	NC_011676.1	359603	360591	plus	1
556484	Phaeodactylum tricornutum CCAP 1055/1	7199654	PHATRDRAFT_44977	PHATRDRAFT_44977	XP_002179079.1	hypothetical protein			5	NC_011673.1	875431	876224	minus	2
556484	Phaeodactylum tricornutum CCAP 1055/1	7198952	PHATRDRAFT_41069	PHATRDRAFT_41069	XP_002185003.1	hypothetical protein			27	NC_011695.1	279721	280665	plus	1
556484	Phaeodactylum tricornutum CCAP 1055/1	7198637	PHATRDRAFT_49943	PHATRDRAFT_49943	XP_002184697.1	hypothetical protein			25	NC_011693.1	371093	372763	plus	1
556484	Phaeodactylum tricornutum CCAP 1055/1	7202411	PHATRDRAFT_47358	PHATRDRAFT_47358	XP_002181546.1	hypothetical protein			13	NC_011681.1	383502	384772	plus	1
556484	Phaeodactylum tricornutum CCAP 1055/1	7197978	PHATRDRAFT_33731	PHATRDRAFT_33731	XP_002178187.1	hypothetical protein			4	NC_011672.1	229687	230680	plus	2
556484	Phaeodactylum tricornutum CCAP 1055/1	7200156	PHATRDRAFT_45297	PHATRDRAFT_45297	XP_002179502.1	hypothetical protein			6	NC_011674.1	765286	766657	minus	1
556484	Phaeodactylum tricornutum CCAP 1055/1	7198577	PHATRDRAFT_40658	PHATRDRAFT_40658	XP_002184641.1	hypothetical protein			25	NC_011693.1	84534	85220	plus	1

## Sheet: All protein sequences
>NP_001031862.1
MTSNLFQPPSMAASRGAISRRTGNVKVLVSFTSSNGKTLSFSDNSFRLRPMFIGKVTEQSSCSSPNEQQQ
DEEQEQEQEEITVSHIKEELYEALKGINRGIFGVKSDKKTEIEGLVKLLECRNPTPEPTGELDKIGGCWK
LIYSTITVLGSKRTKLGLRDFVSLGDLLQQIDIAQGKTVHVLKFDVRGLNLLDGEFRIVASFKISSKSSV
EITYESSTIKPDQLMNIFRKNMDLLLGIFNPEGLFEISYLDEDLQVGRDGKGNVFVLERIEKP
>NP_001154722.1
MAATASSLTIASSFSEPRTQIHSSRRLNLPLQYSIPYKVLRSRSRRLGLVVSSVSAPNVELRTGPDDLIS
TLLSKVANSDGGVTLSPEQHKEVAQVAGELQKYCVKEPVKNPLIFGDWEVVYCSRPTSPGGGYRSVIGRL
FFKTKEMIQAIDAPDIVRNKVSINAFGFLDGDVSLTGKLKALDSEWVQVIFEPPEIKVGSLEFKYGFESE
VKLRITYVDEKLRKKGNNIWGPARV
>NP_001325643.1
MALIQHGSVSGTSAVRLSFSSSVSPPSSSPPLSRVSLNFQSEKKSCYRRMICRAMVQDSVQGIPSVYARE
MERLSAKESLILAFNDAGGFEALVTGKITDMQKIDVNERITNLERLNPTPRPTTSPYLEGRWSFEWFGVN
TPGSLAVRVMFERFPSTLVSLSNMEIFIKDNNTKATANIKLLNSIENKITLSSKLTIEGPLRMKEEYLEG
LLESPTVIEEAVPDQLRGLLGQATTTLQQLPEPIKDTLANGLRIPLGGTYQRFFMISYLDDEILIVRDTA
GVPEVLTRVETSSPMSSSSVVENLEYNS
>NP_001326410.1
MALPWCLKTGVLTSPAAGFNHPSDSGFAVPTKLLSIRKGDRERLRIQAVFSFPPRNGGAEKRKQLKHELV
EAIEPLERGATASPDDQLLIDQLARKVEAVNPTKEPLKSDLINGKWELIYTTSAAILQAKKPRFLRSLTN
YQCINMDTLKVQRMETWPFYNSVTGDLTPLNSKTVAVKLQVFKILGFIPVKAPDGTARGELEITYVDEEL
RSVVNDSFSFLYGTDNQKHLNLETMFIFYRISRGKGNLLFILKMFDPTYRIPL
>NP_001326953.1
MATSSTFSSLLPSPPALLSDHRSPPPSIRYSFSPLTTPKSSRLGFTVPEKRNLAANSSLVEVSIGGESDP
PPSSSGSGGDDKQIALLKLKLLSVVSGLNRGLVASVDDLERAEVAAKELETAGGPVDLTDDLDKLQGKWR
LLYSSAFSSRSLGGSRPGLPTGRLIPVTLGQVFQRIDVFSKDFDNIAEVELGAPWPFPPLEATATLAHKF
ELLGLHFPFSH
>NP_001330170.1
MTSNLFQPPSMAASRGAISRRTGNVKVLVSFTSSNGKTLSFSDNSFRLRPMFIGKVTEQSSCSSPNEQQQ
DEEQEQEQEEITVSHIKEELYEALKGINRGIFGVKSDKKTEIEGLVKLLECRNPTPEPTGELDKIGGCWK
LIYSTITVLGSKRTKLGLRDFVSLGDLLQQIDIAQGKTVHVLKFDVRGLNLLDGEFRIVASFKISSKSVH
YRFLDVFRFFRFLEKSRFDGIAFVCL
>NP_175522.2
MVAVRFYAVEMSLPCLCPCPSSPISLSLCSPRFNLLNTTSRRLGLSRNCRTLRISCSSSSTVTDQTQQSS
FNDAELKLIDALIGIQGRGKSASPKQLNDVESAVKVLEGLEGIQNPTDSDLIEGRWRLMFTTRPGTASPI
QRTFTGVDVFTVFQDVYLKATNDPRVSNIVKFSDFIGELKVEAVASIKDGKRVLFRFDRAAFDLKFLPFK
VPYPVPFRLLGDEAKGWLDTTYLSPSGNLRISRGNKGTTFVLQKETVPRQKLLATISQDKGVAEAIDEFL
ASNSNSAEDNYELLEGSWQMIWSSQMYTDSWIENAANGLMGRQIIEKDGRIKFEVNIIPAFRFSMKGKFI
KSESSTYDLKMDDAAIIGGAFGYPVDITNNIELKILYTDEKMRISRGFDNIIFVHIREI
>NP_181092.1
MATLFTVARPSSLLYVSSINPSKTFSPSISLKLNSLSFSFGYRPKPLRFSKIRSSLPSESESESDLDASA
VTDEWGEKPGDANEPDSQPDNVTVNVITDEWGEKSGPELEESGTRFMESDPPRNEDEWGGEIGGETEADA
GNGSAVSDPTWELKRCLADSVYGTELGFKAGSEVRAEVLELVNQLEALNPTPAPLENPELLDGNWVLLYT
AFSELIPLLAAGSTPLLKVKSISQSIDTNNLIIDNSTTLSSPFADFSFSATASFEVRSPSRIEVSFKEGT
LKPPVIKSSVDLPESVGVFGQQISLSLLKQSLNPLQDVAANISRALSGQPPLKLPFPGNRGSSWLLTTYL
DKDLRISRGDGGLFVLAREGSSLLEL
>NP_189236.3
MALPSCLKTGALMSPATGFNFSGSLMKSDSGFAVPTKLQSTRKGDRERLRVQAIFSFPPAFLTRNGRAEK
QKQLKQELLEAIEPLERGATASPDDQLRIDQLARKVEAVNPTKEPLKSDLVNGKWELIYTTSASILQAKK
PRFLRSITNYQSINVDTLKVQNMETWPFYNSVTGDIKPLNSKKVAVKLQVFKILGFIPIKAPDSARGELE
ITYVDEELRLSRGDKGNLFILKMFDPTYRIPL
>NP_189237.2
MALPWCLKTGVLTSPAAGFNHPSDSGFAVPTKLLSIRKGDRERLRIQAVFSFPPRNGGAEKRKQLKHELV
EAIEPLERGATASPDDQLLIDQLARKVEAVNPTKEPLKSDLINGKWELIYTTSAAILQAKKPRFLRSLTN
YQCINMDTLKVQRMETWPFYNSVTGDLTPLNSKTVAVKLQVFKILGFIPVKAPDGTARGELEITYVDEEL
RISRGKGNLLFILKMFDPTYRIPL
>NP_191360.1
MALIQHGSVSGTSAVRLSFSSSVSPPSSSPPLSRVSLNFQSEKKSCYRRMICRAMVQDSVQGIPSVYARE
MERLSAKESLILAFNDAGGFEALVTGKITDMQKIDVNERITNLERLNPTPRPTTSPYLEGRWSFEWFGVN
TPGSLAVRVMFERFPSTLVSLSNMEIFIKDNNTKATANIKLLNSIENKITLSSKLTIEGPLRMKEEYLEG
LLESPTVIEEAVPDQLRGLLGQATTTLQQLPEPIKDTLANGLRIPLGGTYQRFFMISYLDDEILIVRDTA
GVPEVLTRVETSSPMSSSSVVENLEYNS
>NP_191914.1
MALALSLSACSPPLRRTRRAGFRTSCSIFANPAQRAKRKLLELISEEDRGLRTQKDPKKRDEIVNAIESM
TVIGRSSITTDDSLSATWRLLWTTEKEQLFIIEKAGLFGTTAGDVLQVIDVNKRILNNVITFPPDGVFFV
RSDIDIASPQRVNFRFNSAVLRGKNWELPLPPFGKGWFENVYMDGEIRVAKDIRGDYLIVDRAPYNWTES
FV
>NP_192311.1
MATVPLFTQFPCKTLNPSSSNTKHQSKSPILLPINSINRRSEIGVSVHRPDFKIRATDIDDEWGQDGVER
VFASSSTVSVADKAIESVEETERLKRSLADSLYGTDRGLSVSSDTRAEISELITQLESKNPTPAPNEALF
LLNGKWILAYTSFVGLFPLLSRRIEPLVKVDEISQTIDSDSFTVQNSVRFAGPFSTTSFSTNAKFEIRSP
KRVQIKFEQGVIGTPQLTDSIEIPESVEVLGQKIDLNPIKGLLTSVQDTASSVARTISNQPPLKFSLPSD
NTQSWLLTTYLDKDLRISRGDGGSVYVLIKEGSSLLNP
>NP_193955.1
MATVQLSTQFSCQTRVSISPNSKSISKPPFLVPVTSIIHRPMISTGGIAVSPRRVFKVRATDTGEIGSAL
LAAEEAIEDVEETERLKRSLVDSLYGTDRGLSASSETRAEIGDLITQLESKNPTPAPTEALFLLNGKWIL
AYTSFVNLFPLLSRGIVPLIKVDEISQTIDSDNFTVQNSVRFAGPLGTNSISTNAKFEIRSPKRVQIKFE
QGVIGTPQLTDSIEIPEYVEVLGQKIDLNPIRGLLTSVQDTASSVARTISSQPPLKFSLPADNAQSWLLT
TYLDKDIRISRGDGGSVFVLIKEGSPLLNP
>NP_196544.3
MTSNLFQPPSMAASRGAISRRTGNVKVLVSFTSSNGKTLSFSDNSFRLRPMFIGKVTEQSSCSSPNEQQQ
DEEQEQEQEEITVSHIKEELYEALKGINRGIFGVKSDKKTEIEGLVKLLECRNPTPEPTGELDKIGGCWK
LIYSTITVLGSKRTKLGLRDFVSLGDLLQQIDIAQGKTVHVLKFDVRGLNLLDGEFRIVASFKISSKSSV
EITYESSTIKPDQLMNIFRKNMDLLLGIFNPEGLFEISYPFLIKIQNRN
>NP_197494.1
MAATASSLTIASSFSEPRTQIHSSRRLNLPLQYSIPYKVLRSRSRRLGLVVSSVSAPNVELRTGPDDLIS
TLLSKVANSDGGVTLSPEQHKEVAQVAGELQKYCVKEPVKNPLIFGDWEVVYCSRPTSPGGGYRSVIGRL
FFKTKEMIQAIDAPDIVRNKVSINAFGFLDGDVSLTGKLKALDSEWVQVIFEPPEIKVGSLEFKYGFESE
VKLRITYVDEKLRLGLGSKGSLFVFRRRQ
>XP_002176901.1
MKILTLTPFPLLFLCKIAFDARLLTHAFSGGDPGGIGARGSKSALFQFYTESDPSDYDAADLTGEKSVAV
DENEADSIIRDDLKRELLLLSSVTNRGEYASPDEQNIIVDIVAQLEALNPTADPASNCQGEWDLALSSTQ
FFRSSPFFQSIRVAMGENNKAMAENAFDIHDRATTASRVGRVRQTISDTKLLSEVELEVGLLPGFPIRVK
GTVITSATLDVVSPETWETRIIETHVKGSNIPIINEFLDDARFEIPVSNIYNTLQGQVPVVPMKTFYLDE
GVRITRDIDDNIFVFTRA
>XP_002178187.1
MMYALLFACMSGATALVVRTPATRLSFQEFRKTLPSNFNVVQSGGWYALEQTATAKLAARNFAKLRPDLP
PTFDVEEVQGGWSTMETLAADPKGALVQIVASLNRKGETAATVSADYLDAILALLRAQGKGFDSNLVDGE
WLLVMQKQGSKSPRFQKLVGKGEKPGKSYSDFDVGHGTFSGTVKLLKGLGLVSSTVQYRPVADNFDRTTV
GGGQPGIVLRRISCDIVDASVKVWKLPKLSLRFLRKKGGYLDFVYLDRDLRVTTGNRGGVFIHARPSFVT
TMLS
>XP_002179079.1
MARLLRLLPLLFFYVAQPANCLQNVIPRLTFPSPMFSINKGKARELEDELLKAIQDEGNRLANSERINSL
VKQLENNSQSIPEPAIAAEVYGRWRLMHTTNAATSSPIQRKAVDTAKFPIYQDIIVNEKGQLQVNQIVQF
SEKAILSVDALASTAAYPLPEFTDRQSTGEVLGINILGVSLVGEVAQPNPDRPNSRINFVFEEGNFDFDG
LKIPYPVPFRLPLLRDWRSCTNRKGQ
>XP_002179502.1
MSRVGLILSFAALFVATSGFTTNPTSFRAPRQSLLLQQSSSSTIRGMPVAKEVARQNLVDTAEQLKQQHG
LLLVERSAQDELKRAADSFESLAQPPALESYKRDFIGDWTLVCSTATNADGVDTTRLPSFAQDPIKKIRE
TISEAANKYLTVQQRIRSTNDDDVIDRIDHVLEYQPPAQLKELLDNLPPQLRSLNINPLEVSKSKLILVH
KASIESEIPLFTKLSLTSIVLNVAGQSTSLDPDGKDVAGINLPLGEFINSGDFETTYMDETLRISRGKLG
PVDQLRVFVRTDRQRQIEALMDIVETDVGMGVTSEMDVDEDKDPEFTTSNSQDEVVDDIGEEASTEDDVD
SKSVLNDTMEEEIKALDEDKEGVDDDKGPPKDSSGKKS
>XP_002180024.1
MRLTLPIATLVALGASSSVSAFAVLGPSSSSHHTAALARTSSKTSSRLFMSEPSDTSTDDTSFIYASDGD
SDVVDTESSNYTPTAGEAMVSNIMDMMPRQLGADNVSDEARSAINEALYKLEALNPTTSPTVSPLLNGVW
ELRYVGGYSSDWALPSPTRQLALFLYSGGYSPGTFALALAQKLPSSVVDVGDLEIAISRQQPRVEATVPV
KILGGGESKIVVQARLETKSDLRMRETYESAQLVGNNVIELPQPLQYARDLYVTYVDEDLLIVRDASGVP
EVLVRKEKTFSKVWGVEPGQADLDGEGPSGVSEF
>XP_002181546.1
MDVRFSGRSRAVLLLASALCCAVGAFLPATPLPSCGRISHLKYSDQTEYQEVNDSTKEVLLQLVQSTPPN
APTPAYMTNEILRVVRQLEEECPTPDDEVLSELAGNWELIWTTQDKTRPEAKRSLGRSWINPLENQSYSN
NPEGRSNPFLPRPIQHRLEKLGLVTNAAVVQSTQAVDLKKQKVSNVVAFGLARVRQRASLTVKVAFRPST
IDVRRIDVKFESCRIKLPGTPIDTTIPLGLAGPIGWLQTNYIDENLRITRGHKGSVFVLKRPRRATV
>XP_002182473.1
MMREQRMLAILWGAGLWFGGSGVHAWQFPNLFTVPIQPSQKFSQGSTAKSGGYSHTHTLPGSLQKQAVLD
AVSGTNNGKTATPNQQQTVLRRVRELEQSFPPFRLADASQAARLDGIWYLQYTSPSTVGDNNNNNNNNSE
DAWQPSYATEGDSRIETRPFQARGTVSAAGIRVDTANKVVQQILDVSNARVANDVVLEWGRVYVAGSFRP
SDMVPNRAVVSFDTAEITVAQQGGTEKGWKIQLGWFFWILSKIRGTTENGWLETTFVDDTLRIGRGNKGT
LFVLTRDVDAVQP
>XP_002182708.1
MKPLVSIFSVALLTSFAWLHQTSAFGVRRSSNRSARAAPPLDPTLRSAVDAFTSKGFEKRDDTKNENQGE
FANKSAAEIKGELLELLPSMTGQEDEFRRVEELVNALEARYQPAQTLTFLNLAMQGSWQLLFSTNLSGTP
NPAKFRLRELTQRIECNNLDGVVTNQALWDLAEAGDAAFDATGTFSVKCNYSINQGARMIVDLEDHLLQP
ARGSAIPQDVQGLVGYLHRAMPKTLFDPSDHAMDTTYLDVDLRIVRYTGARLEGSRDIFMRASALEINPT
KDDVPREE
>XP_002184641.1
MVKALPLCYVGFLAATTGSGCAFAPPSGTPLLPAFGLGSSALAASTLTEKDELVLSVVLLARTLGPVGVY
NSEEEQSKLKQLADQLADFSDPAPALKSLSGRHELVYSAAPGGSSGKLFGPIFGRVTQEFVDDLTFLNAV
EIGPLKLSLRAERKVMDDRVIQVSFKESIVSVFGNELIRKEIGGGGTWKYIFAGVMTDPASGKRKLLRVM
ETPSLFVIEAPVEESSIL
>XP_002184697.1
MYAVTILCWAGCWWSLGDAFAVSPLFHPLFVVRNNRPASWSYTTELSLAKGNKRSNEPRFESQAPNRTVL
ETVKGNQSDSSTLESTSPRDAEATKNTTASVRSIPENTPNATVAVSSSPPPPLRKIESSPSPTIPPPRVS
SHKPTNVAKNWLYLQSIGAITGRGEFASASQKESVRTVVAALEAVNPTPEPAASPHLLGRWELVFTDTHL
FRSSPFFMAARAVCVTDDAVQQFHWFCDMHRRALAISNIRAVRQIIGPTRLTSEFEVRAGAVPFLHDFTP
WAYSGGWPITIDGSIVSTADWRLTTNATAASSSSNETNNAMEFYMDTVQIKGSNLPGLRQILDTGNVQLQ
SRELARWLENTVASYHTPRPVFATTYLDETLRISRDVDGHVFVYVKTSDDTTPTDYSPIDADLGVGRLLE
GFNDAVTKFYL
>XP_002184985.1
MPGRVVPLSLLAVVCASDLFRSTLAFHPKVSTSSRTIPPSTTQLHAFGFLNGLLESGSKKTKAASSTKAS
ALKQKLLAACSEDKPDRSIIEATIQELETLSPVTATASSPLLQKKWEMIWTTEKEINFFVERGFSSKIFQ
TIDGSVLTNNIPFIKGGSFNVTGSLSVPDIEGIRTEFTFSEAALDLAKWGTYKLPPVGKGWFDTLYLDDT
LRVDLNSRNDILICKPDEA
>XP_002185003.1
MRPIVGYATALTVCLLLYTIEGFTRTVFLQAKTASLYVQTRGLSQFIHSQRRALQRGHGLKPSQLNAERL
SNAVESSRLKKELLALAKRTLRGFQASTKDRRRARSLIDQLAALNPTRDPAKSYYATQTQESNAIDSKDG
SSSKLVGEASLSGKWTLVYTDAPDITALGTTNPWAKLGRIGQECEPPYIRNVIEWKRPGWATSLPFSGSE
ESRVLQRVVTKATASPDQPMVVNLDIVGLRINADAPTTLSNFAEAIQSQGLIAGFFQAAPVDLQGPLQAP
FGKFEVLYLDEELRAVKTGQGYVAVNLRTGDEWI
>XP_002186041.1
MLVSLYTIALLSFSLNEAESFSSRGGKAHLSPLHLAPQDEDLTAPSDILECSVPTNPVLCDRLKCELYQL
GASYDRGFGASPGARAKAQAVVEELERMTPENAAAQGIEGTHPNGSPLAGSWRMIWTTAVDVLLLNASPV
FITGAVHQVFDPPVVTNVIDFLPRAQSLFPPDVVPSSLLRAKVQTKASPRQNKPNRVGLLFEKVQVQPLQ
ILGVDVNMVPPLGFNLPKLPGTDNGDSPGYFDVTYLDHELLVIRQNAPGGLFALVRVNSIDP
